# Supplementary material
Source: publisher figshare collection journal article supplement (https://tandf.figshare.com/ndownloader/files/19616705)
Supplement: Supplementary file 1 [file 19616705]

**Appendix Table 1.** Univariate and multivariate analysis of chronic oedema.

|  |  | **Univariate** | | **Multivariate** | |
| --- | --- | --- | --- | --- | --- |
| **Parameter** | **n** | **OR (95% CI)** | **p*** | **OR (95% CI)** | **p*** |
| **Hypofractionation**  No  Yes | 446  340 | 1  0.20 (0.09-0.44) | **0.0001** | 1  0.18 (0.04-0.75) | **0.018** |
| **EIC**  Absent  Present | 548  169 | 1  3.0 (1.66-5.46) | **0.0001** | 1  1.06 (0.54-2.12) | 0.86 |
| **Boost dose**  None  <10 Gy or equivalent  ≥10 Gy or equivalent | 51  506  229 | 1  1.42 (0.18-11.05)  9.02 (1.21-67.45) | 0.74  **0.032** | 1  0.98 (0.12-8.11)  3.37 (0.40-28.38) | 0.98  0.26 |
| **Breast size (cc)**  ≤492 (median)  >492 | 365  364 | 1  2.67 (1.41-5.05) | **0.003** | 1  1.70 (0.80-3.58) | 0.17 |
| **Dmax/Prescribed dose**  >107%  ≤107% | 273  455 | 1  0.31 (0.14-‘-66) | **0.003** | 1  1.84 (0.53-6.37) | 0.34 |

**Appendix Table 2.** Univariate and multivariate analysis of acute erythema/hyperpigmentation.

|  |  | **Univariate** | | **Multivariate** | |
| --- | --- | --- | --- | --- | --- |
| **Parameter** | **N** | **OR (95% CI)** | **p*** | **OR (95% CI)** | **p*** |
| **HER2 status**  Negative  Positive  Equivocal | 585  101  23 | 1  0.30 (0.14-0.63)  0.16 (0.02-1.18) | **0.002**  0.072 | 1  0.16 (0.04-0.75)  0.14 (0.02-1.10) | **0.02**  0.062 |
| **Trastuzumab**  No  Yes | 715  71 | 1  0.39 (0.18-0.87) | **0.022** | 1  1.38 (0.26-7.36) | 0.70 |
| **Smoking habits**  No  Yes | 594  114 | 1  2.14 (1.37-3.32) | **0.001** | 1  1.83 (1.06-3.15) | **0.03** |
| **Boost dose**  None  <10 Gy or equivalent  ≥10 Gy or equivalent | 51  506  229 | 1  1.80 (0.75-4.34)  2.60 (1.06-6.41) | 0.19  **0.038** | 1  2.11 (0.61-7.37)  1.48 (0.38 (5.73) | 0.24  0.57 |
| **Breast size (cc)**  ≤492 (median)  >492 | 365  364 | 1  1.78 (1.24-2.54) | **0.002** | 1  1.97 (1.26-3.07) | **0.003** |

**Appendix Table 3.** Univariate and multivariate analysis of chronic erythema/hyperpigmentation.

|  |  | **Univariate** | | **Multivariate** | |
| --- | --- | --- | --- | --- | --- |
| **Parameter** | **n** | **OR (95% CI)** | **p*** | **OR (95% CI)** | **p*** |
| **Hypofractionation**  No  Yes | 446  340 | 1  0.40 (0.25-0.63) | **0.0001** | 1  0.76 (0.34-1.67) | 0.49 |
| **EIC**  Absent  Present | 548  169 | 1  2.39 (1.54-3.71) | **0.0001** | 1  1.65 (0.98-2.79) | 0.061 |
| **Final surgical margins**  ≥2 mm  0.1-1.9 mm  Positive (not re-excised) | 675  75  29 | 1  1.13 (0.58-2.23)  3.47 (1.56-7.71) | 0.72  **0.002** | 1  1.02 (0.48-2.17)  2.23 (0.92-5.40) | 0.97  0.076 |
| **Boost dose**  None  <10 Gy or equivalent  ≥10 Gy or equivalent | 51  506  229 | 1  6.10 (0.83-45.02)  15.43 (2.08-114.3) | 0.076  **0.007** | 1  5.14 (0.68-38.66)  7.15 (0.91-55.93) | 0.11  0.061 |
| **Breast size (cc)**  ≤492 (median)  >492 | 365  364 | 1  1.58 (1.04-2.41) | **0.034** | 1  1.42 (0.87-2.32) | 0.17 |
| **Dmax/Prescribed dose**  >107%  ≤107% | 273  455 | 1  0.45 (0.28-0.73) | **0.001** | 1  0.79 (0.37-1.69) | 0.54 |

**Appendix Table 4.** Univariate and multivariate analysis of acute wet desquamation.

|  |  | **Univariate** | | **Multivariate** | |
| --- | --- | --- | --- | --- | --- |
| **Parameter** | **n** | **OR (95% CI)** | **p*** | **OR (95% CI)** | **p*** |
| **Hypofractionation**  No  Yes | 446  340 | 1  0.14 (0.03-0.61) | **0.009** | 1  0.07 (0.009-0.59) | **0.014** |
| **Dmax/Prescribed dose**  >107%  ≤107% | 273  455 | 1  0.29 (0.08-0.99) | **0.047** | 1  2.11 (0.36-12.48) | 0.41 |

* In bold reported p-value <0.05.
